# Supplementary material for: High speed multi-frequency impedance analysis of single particles in a microfluidic cytometer using maximum length sequences
Source: Royal Society of Chemistry journal article supplement (doi:10.1039/b703546b), 2007-01-01

**Supplementary information:**

**Experimental method: Microfluidic setup**

A valve selects different liquid inputs, for example washing or priming liquids. A motorized syringe pump is used for fast purging of the whole line at high pressure to prevent channel clogging and a sample valve selects either cleaning liquid or sample. Pressure control of the sample tube is provided by a high-precision pressure regulator (Marsh-Bellofram), allowing precise control of fluid flow. The level of the liquid in the collection vials is set so as to produce a small back-flow when atmospheric pressure is applied to the sample.

**Fig. 1 Supplementary:**

Diagram showing the AC impedance measurement setup and the microfluidic control.

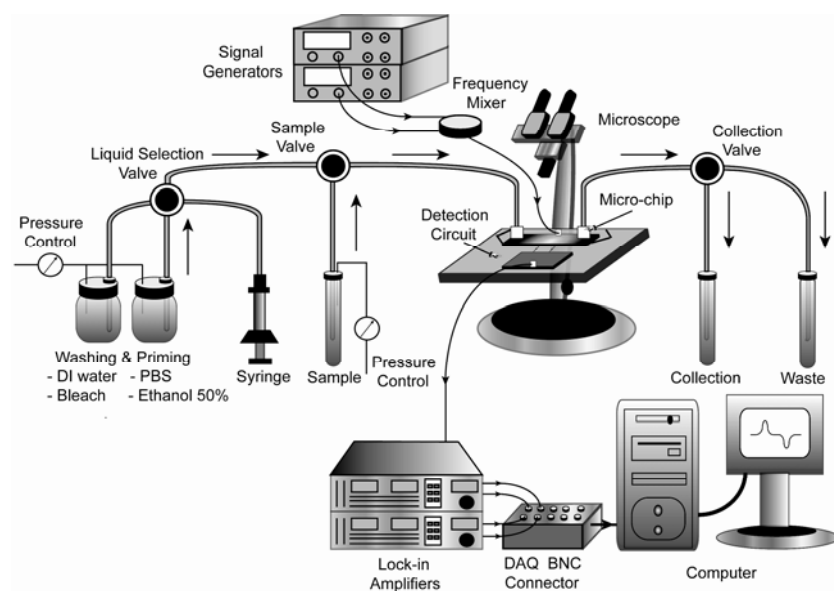

Supplement: b703546b.pdf [file b703546b.pdf]
